# Supplementary material for: CRISPR prime editing for unconstrained correction of oncogenic KRAS variants
Source: PubMed Central journal article supplement (PMC10313713; doi:10.1038/s42003-023-05052-1), 2023-06-30
Supplement: 42003_2023_5052_MOESM2_ESM.pdf [file 42003_2023_5052_MOESM2_ESM.pdf]

## Supplementary Information

### CRISPR prime editing for unconstrained correction of oncogenic *KRAS* variants.

Gayoung Jang<sup>1,2</sup>, Jiyeon Kweon<sup>1,2</sup>, Yongsub Kim<sup>1,2,\*</sup>

<sup>1</sup> Department of Cell and Genetic Engineering, Asan Medical Institute of Convergence Science and Technology, Asan Medical Center, University of Ulsan College of Medicine, Seoul 05505, Republic of Korea

<sup>2</sup> Stem Cell Immunomodulation Research Center, University of Ulsan College of Medicine, Seoul 05505, Republic of Korea

\* Corresponding author: Yongsub Kim, PhD (email: yongsub1.kim@gmail.com)

#### Table of contents

Supplementary Figure 1. *KRAS* correction frequency of *KRAS*-#1 universal pegRNA in HEK293T/17-*KRAS* library cells.

Supplementary Figure 2. Optimization of pegRNAs to generate *KRAS* heterozygous HEK293T/17 cells.

Supplementary Figure 3. *KRAS* correction frequencies in *KRAS* heterozygous HEK293T/17 cells.

Supplementary Figure 4. *KRAS* correction with pegRNA capable of inducing silent mutation in G12V heterozygous HEK293T/17 cells.

Supplementary Figure 5. Analysis of potential off-target effects of the universal epegRNA.

Supplementary Table 1. Substitution and indel frequencies at endogenous *KRAS* sites in HEK293T/17-*KRAS* library cells.

Supplementary Table 2. Prime editing and indel frequencies in HEK293T/17-*KRAS* heterogenous cells.

Supplementary Table 3. List of potential off-target sites.

Supplementary Table 4. *KRAS*-mutant target sequences used in HEK293T/17-*KRAS* library cells.

Supplementary Table 5. Sequences of gRNA and pegRNAs used in this study.

Supplementary Table 6. Primer sequences used in this study.

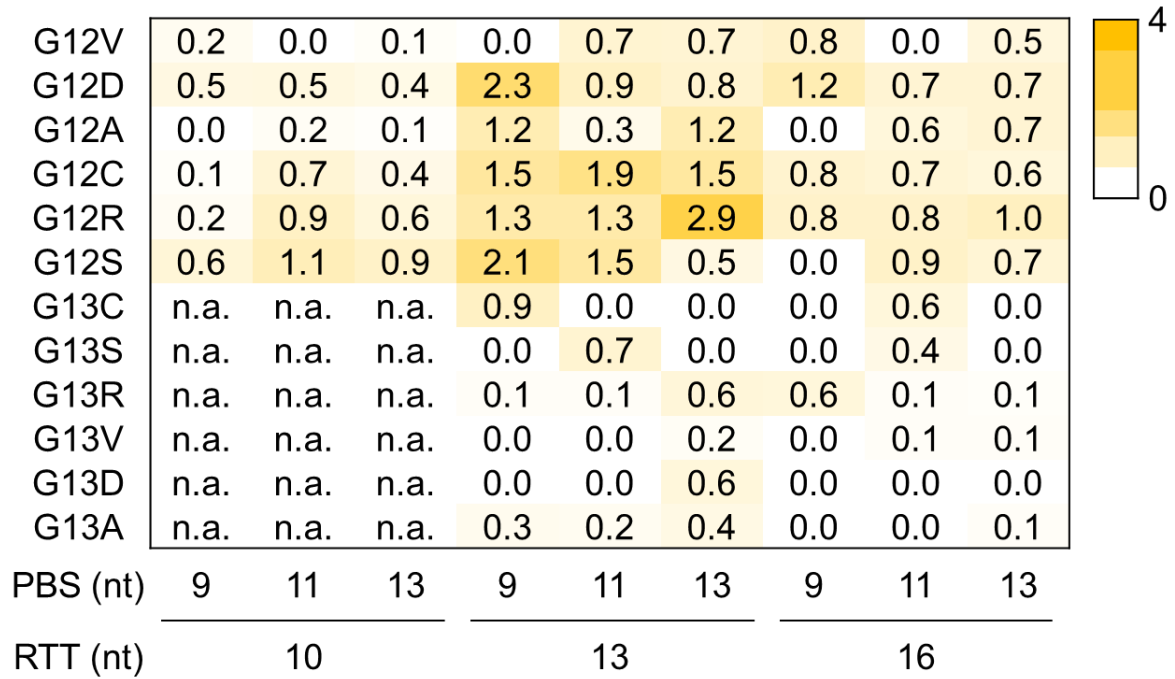

**Supplementary Figure 1.** *KRAS* correction frequency of *KRAS*-#1 universal pegRNA in HEK293T/17-*KRAS* library cells.

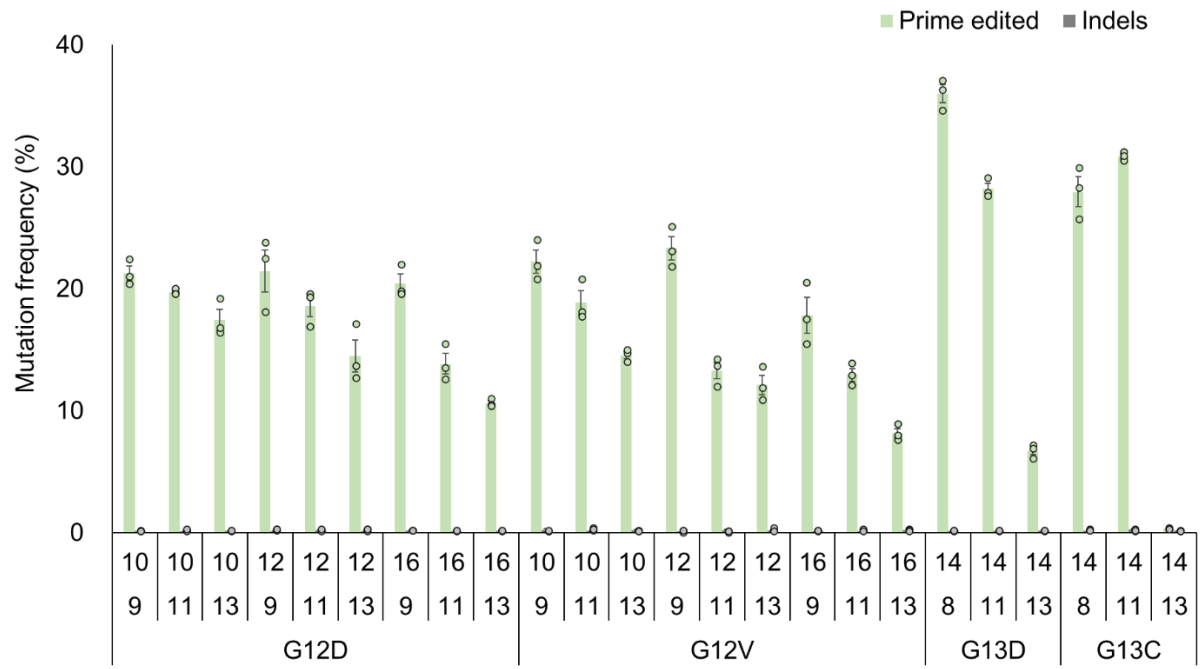

**Supplementary Figure 2.** Optimization of pegRNAs to generate *KRAS* heterozygous HEK293T/17 cells. Error bar means s.e.m. of  $n=3$  biological triplicate samples.

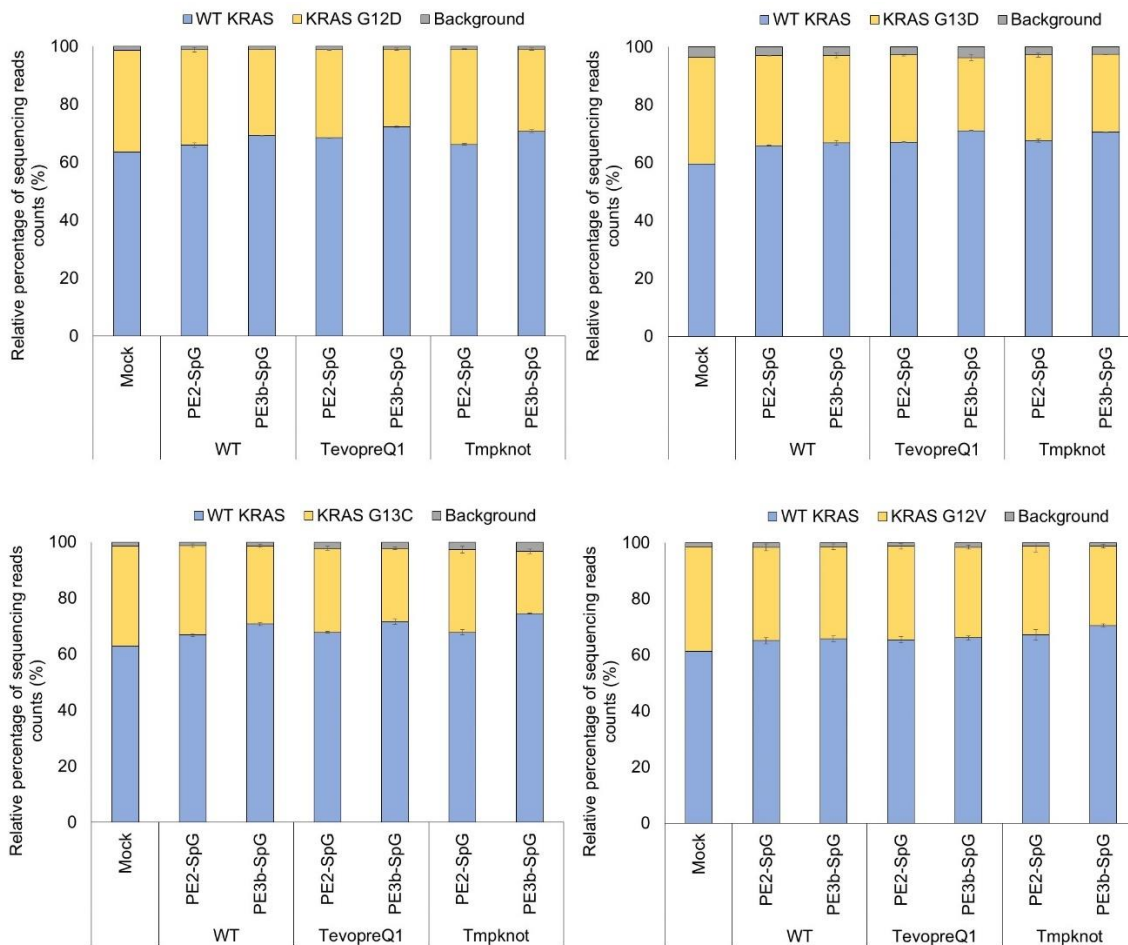

**Supplementary Figure 3.** *KRAS* correction frequencies in *KRAS* heterozygous HEK293T/17 cells. Target sites were amplified and analyzed by targeted-deep sequencing. Relative counts of sequencing reads were calculated from total number of sequencing reads of wild-type *KRAS* sequences and mutant *KRAS* sequences. Error bar means s.e.m. of  $n=3$  biological triplicate samples.

*KRAS* G12V mutant alleles of HEK293T/17 heterogenous cells

E Y K L V V V G A V G V G K S A L T  
 5' -GAATATAAACTTGTGGTAGTTGGAGC **T**GTGGCGTAGGCAAGAGTGCCTTGACGA-3'  
 3' -CTTATATTTGAACACCATCAACCTCGACAACCGC **A**TCCGTTCTCACGGAAGTGC**T**-5'

↓  
 Prime editing  
 using the universal pegRNA  
 containing a silent mutation

E Y K L V V V G A G G V G K S A L T  
 5' -GAATATAAACTTGTGGTAGTTGGAGC **A**GTGGCGTAGGCAAGAGTGCCTTGACGA-3'  
 3' -CTTATATTTGAACACCATCAACCTCGTCCACCGCATCCGTTCTCACGGAAGTGC**T**-5'

|           |                                           |             |       |
|-----------|-------------------------------------------|-------------|-------|
| Untreated | TAGTTGGAGCT <b>G</b> TGGCGTAGGCAA         | (2434/4029) | 60.4% |
|           | TAGTTGGAGCT <b>T</b> TGGCGTAGGCAA         | (1519/4029) | 37.7% |
|           | TAGTTGGAGC <b>A</b> <b>G</b> TGGCGTAGGCAA | (0/4029)    | 0.0%  |
|           | TAGTTGGAGC <b>A</b> <b>T</b> TGGCGTAGGCAA | (0/4029)    | 0.0%  |

|                   |                                           |             |       |
|-------------------|-------------------------------------------|-------------|-------|
| pegRNA<br>treated | TAGTTGGAGCT <b>G</b> TGGCGTAGGCAA         | (2889/4738) | 61.0% |
|                   | TAGTTGGAGCT <b>T</b> TGGCGTAGGCAA         | (1561/4738) | 32.9% |
|                   | TAGTTGGAGC <b>A</b> <b>G</b> TGGCGTAGGCAA | (206/4738)  | 4.3%  |
|                   | TAGTTGGAGC <b>A</b> <b>T</b> TGGCGTAGGCAA | (0/4738)    | 0.0%  |

**Supplementary Figure 4.** *KRAS* correction with pegRNA capable of inducing silent mutation in G12V heterozygous HEK293T/17 cells. The pegRNA could induce T:A to A:T silent mutation at alanine 11 residue and correct *KRAS* G12V mutation. The silent mutation and *KRAS* G12V mutation were highlighted in blue and red, respectively, and the spacer sequences of pegRNA were boxed. NGS sequencing results showed that *KRAS* correction was accompanied by the silent mutation, indicating that *KRAS* correction was induced by prime editing.

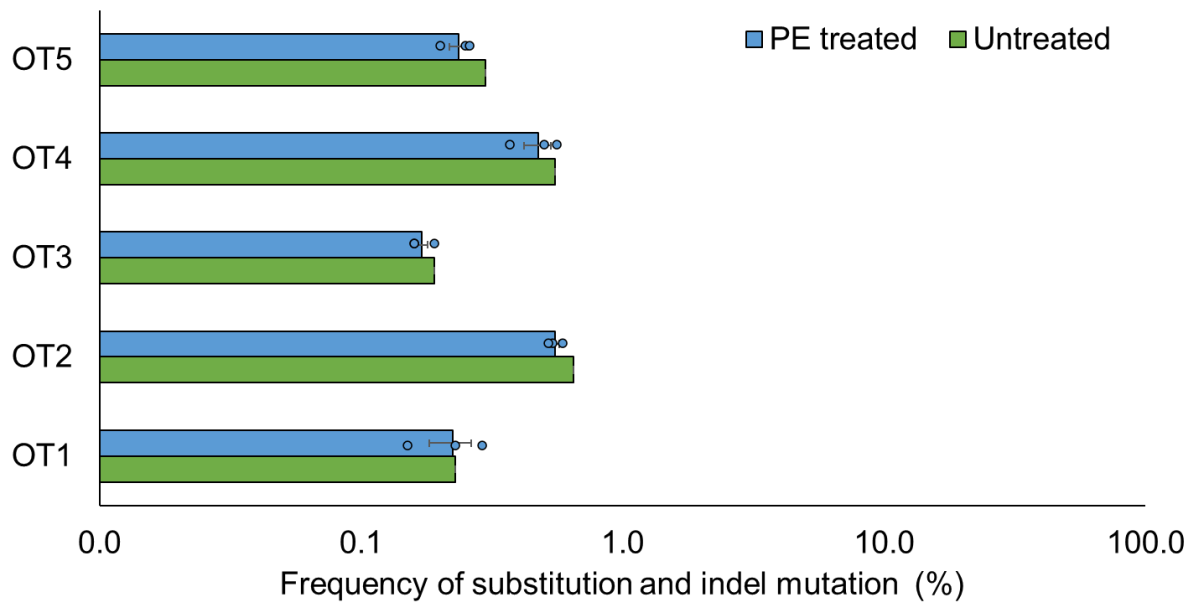

**Supplementary Figure 5.** Analysis of potential off-target effects of the universal epegRNA. Five potential-offtarget sites were selected *in silico* and the universal epegRNA was transfected into HEK293T/17-KRAS G12V cells with PEmax-SpG-hMLH1dn. Targeted-deep sequencing results showed that there were no significant off-target mutations in the five potential off-target sites. The potential off-target sites were listed in Supplementary Table 3. Error bar means s.e.m. of biological triplicate.

**Supplementary Table 1.** Substitution and indel frequencies at endogenous *KRAS* sites in HEK293T/17-*KRAS* library cells.

| pegRNA names          | PBS length (nt) | RTT length (nt) | Replicate 1       |            | Replicate 2       |            |
|-----------------------|-----------------|-----------------|-------------------|------------|-------------------|------------|
|                       |                 |                 | Substitutions (%) | Indels (%) | Substitutions (%) | Indels (%) |
| Universal pegRNA #2-1 | 9               | 10              | 1.3%              | 0.1%       | 1.3%              | 0.1%       |
| Universal pegRNA #2-2 | 11              | 10              | 1.3%              | 0.1%       | 1.3%              | 0.1%       |
| Universal pegRNA #2-3 | 13              | 10              | 1.5%              | 0.1%       | 1.2%              | 0.0%       |
| Universal pegRNA #2-4 | 9               | 13              | 1.3%              | 0.0%       | 1.2%              | 0.0%       |
| Universal pegRNA #2-5 | 11              | 13              | 1.5%              | 0.1%       | 1.4%              | 0.0%       |
| Universal pegRNA #2-6 | 13              | 13              | 1.4%              | 0.0%       | 1.5%              | 0.0%       |
| Universal pegRNA #2-7 | 9               | 16              | 1.5%              | 0.0%       | 1.2%              | 0.0%       |
| Universal pegRNA #2-8 | 11              | 16              | 1.4%              | 0.1%       | 1.6%              | 0.0%       |
| Universal pegRNA #2-9 | 13              | 16              | 1.4%              | 0.1%       | 1.4%              | 0.0%       |
| Mock                  |                 |                 | 1.6%              | 0.1%       |                   |            |

| PE systems | PBS length (nt) | RTT length (nt) | RNA scaffolds | Replicate 1       |            | Replicate 2       |            |
|------------|-----------------|-----------------|---------------|-------------------|------------|-------------------|------------|
|            |                 |                 |               | Substitutions (%) | Indels (%) | Substitutions (%) | Indels (%) |
| PE2-SpG    | 13              | 16              | Wild-type     | 0.0%              | 0.0%       | 0.6%              | 0.0%       |
| PE3b-SpG   | 13              | 16              | Wild-type     | 0.8%              | 0.0%       | 0.6%              | 0.0%       |
| PE2-SpG    | 13              | 16              | TevopreQ1     | 0.8%              | 0.0%       | 0.5%              | 0.0%       |
| PE3b-SpG   | 13              | 16              | TevopreQ1     | 0.5%              | 0.0%       | 0.6%              | 0.1%       |
| PE2-SpG    | 13              | 16              | Tmpknot       | 0.6%              | 0.2%       | 0.6%              | 0.1%       |
| PE3b-SpG   | 13              | 16              | Tmpknot       | 0.5%              | 0.0%       | 0.6%              | 0.1%       |
| Mock       |                 |                 |               | 0.8%              | 0.1%       |                   |            |

**Supplementary Table 2.** Prime editing and indel frequencies in HEK293T/17-*KRAS* heterogenous cells.

| PE systems | PBS length (nt) | RT length (nt) | RNA scaffolds | G12D                                 |            | G12V                                 |            | G13D                                 |            | G13C                                 |            |
|------------|-----------------|----------------|---------------|--------------------------------------|------------|--------------------------------------|------------|--------------------------------------|------------|--------------------------------------|------------|
|            |                 |                |               | % of wild-type <i>KRAS</i> sequences | Indels (%) | % of wild-type <i>KRAS</i> sequences | Indels (%) | % of wild-type <i>KRAS</i> sequences | Indels (%) | % of wild-type <i>KRAS</i> sequences | Indels (%) |
| PE2-SpG    | 13              | 16             | Wild-type     | 66.6                                 | 0.0        | 65.1                                 | 0.0        | 66.1                                 | 0.0        | 66.1                                 | 0.0        |
| PE3b-SpG   | 13              | 16             | Wild-type     | 68.8                                 | 0.0        | 65.8                                 | 0.0        | 67.4                                 | 0.0        | 69.2                                 | 0.0        |
| PE2-SpG    | 13              | 16             | TevopreQ1     | 68.6                                 | 0.0        | 65.5                                 | 0.0        | 68.3                                 | 0.0        | 67.1                                 | 0.0        |
| PE3b-SpG   | 13              | 16             | TevopreQ1     | 71.0                                 | 0.0        | 66.2                                 | 0.0        | 71.2                                 | 0.0        | 70.1                                 | 0.0        |
| PE2-SpG    | 13              | 16             | Tmpknot       | 67.2                                 | 0.0        | 67.2                                 | 0.0        | 68.8                                 | 0.0        | 66.5                                 | 0.0        |
| PE3b-SpG   | 13              | 16             | Tmpknot       | 69.9                                 | 0.0        | 70.6                                 | 0.0        | 71.2                                 | 0.2        | 72.1                                 | 0.0        |
|            |                 | Mock           |               | 62                                   |            | 61.2                                 |            | 59.5                                 |            | 62.9                                 |            |



**Supplementary Table 3.** List of potential off-target sites.

| Target mutations |     | Target sequences (5' to 3') | PAM | Chr.  | Mismatches (bp) |
|------------------|-----|-----------------------------|-----|-------|-----------------|
|                  | ON  | CGTCAAGGCACTCTTGCCTA        | CG  | chr12 | 0               |
| c.35T>G (G12V)   | OT1 | CGTCActGCACTCTTGCCTA        | GG  | chr19 | 2               |
|                  | OT2 | aGaCAAGGCACTtTTGCCTA        | TG  | chr4  | 3               |
|                  | OT3 | CGTCAtGGgACTCTTtCCCTA       | CG  | chr10 | 3               |
|                  | OT4 | aGTCAAGGCACTCcTaCCCTA       | TG  | chr6  | 3               |
|                  | OT5 | CGTCActGCACTCTaGCCTA        | GG  | chr5  | 3               |

**Supplementary Table 4.** *KRAS*-mutant target sequences used in HEK293T/17-*KRAS* library cells.

| <i>KRAS</i> mutation | <i>KRAS</i> mutant target sequence(5' to 3')                   | Barcode sequence |
|----------------------|----------------------------------------------------------------|------------------|
| G12V                 | ATGACTGAATATAAACTTGTGGTAGTTGGAGCTGtTGGCGTAGGCAAGAGTGCCTTGACG   | CGAGTAAT         |
| G12D                 | ATGACTGAATATAAACTTGTGGTAGTTGGAGCTGaTGGCGTAGGCAAGAGTGCCTTGACG   | TCTCCGGA         |
| G12A                 | ATGACTGAATATAAACTTGTGGTAGTTGGAGCTGcTGGCGTAGGCAAGAGTGCCTTGACG   | AATGAGCG         |
| G12C                 | ATGACTGAATATAAACTTGTGGTAGTTGGAGCTtGTGGCGTAGGCAAGAGTGCCTTGACG   | GGAATCTC         |
| G12R                 | ATGACTGAATATAAACTTGTGGTAGTTGGAGCTcGTGGCGTAGGCAAGAGTGCCTTGACG   | TTCTGAAT         |
| G12S                 | ATGACTGAATATAAACTTGTGGTAGTTGGAGCTaGTGGCGTAGGCAAGAGTGCCTTGACG   | ACGAATTC         |
| G13C                 | ATGACTGAATATAAACTTGTGGTAGTTGGAGCTGGTtGCGTAGGCAAGAGTGCCTTGACG   | AGCTTCAG         |
| G13S                 | ATGACTGAATATAAACTTGTGGTAGTTGGAGCTGGTaGCGTAGGCAAGAGTGCCTTGACG   | GCGCATTa         |
| G13R                 | ATGACTGAATATAAACTTGTGGTAGTTGGAGCTGGTcGCGTAGGCAAGAGTGCCTTGACG   | CATAGCCG         |
| G13V                 | ATGACTGAATATAAACTTGTGGTAGTTGGAGCTGGTgCGTAGGCAAGAGTGCCTTGACG    | TTCGCGGA         |
| G13D                 | ATGACTGAATATAAACTTGTGGTAGTTGGAGCTGGTgAcGCGTAGGCAAGAGTGCCTTGACG | GCGCGAGA         |
| G13A                 | ATGACTGAATATAAACTTGTGGTAGTTGGAGCTGGTgCcGCGTAGGCAAGAGTGCCTTGACG | CTATCGCT         |

**Supplementary Table 5.** Sequences of gRNA for PE3b, pegRNAs and epegRNAs used in this study.

| gRNA or pegRNA name     | Spacer sequence (5' to 3') | PAM | 3' extension sequence (5' to 3') | PBS length (nt) | RTT length (nt) |
|-------------------------|----------------------------|-----|----------------------------------|-----------------|-----------------|
| G12D mutant pegRNA #1   | AAACTTGTGGTAGTTGGAGC       | TGG | GCCAtCAGCTCCAAC TACC             | 9               | 10              |
| G12D mutant pegRNA #2   | AAACTTGTGGTAGTTGGAGC       | TGG | GCCAtCAGCTCCAAC TACCAC           | 11              | 10              |
| G12D mutant pegRNA #3   | AAACTTGTGGTAGTTGGAGC       | TGG | GCCAtCAGCTCCAAC TACCACAA         | 13              | 10              |
| G12D mutant pegRNA #4   | AAACTTGTGGTAGTTGGAGC       | TGG | ACGCCAtCAGCTCCAAC TACC           | 9               | 12              |
| G12D mutant pegRNA #5   | AAACTTGTGGTAGTTGGAGC       | TGG | ACGCCAtCAGCTCCAAC TACCAC         | 11              | 12              |
| G12D mutant pegRNA #6   | AAACTTGTGGTAGTTGGAGC       | TGG | ACGCCAtCAGCTCCAAC TACCACAA       | 13              | 12              |
| G12D mutant pegRNA #7   | AAACTTGTGGTAGTTGGAGC       | TGG | GCCTACGCCAtCAGCTCCAAC TACC       | 9               | 16              |
| G12D mutant pegRNA #8   | AAACTTGTGGTAGTTGGAGC       | TGG | GCCTACGCCAtCAGCTCCAAC TACCAC     | 11              | 16              |
| G12D mutant pegRNA #9   | AAACTTGTGGTAGTTGGAGC       | TGG | GCCTACGCCAtCAGCTCCAAC TACCACAA   | 13              | 16              |
| G12V mutant pegRNA #1   | AAACTTGTGGTAGTTGGAGC       | TGG | GCCAAcAGCTCCAAC TACC             | 9               | 10              |
| G12V mutant pegRNA #2   | AAACTTGTGGTAGTTGGAGC       | TGG | GCCAAcAGCTCCAAC TACCAC           | 11              | 10              |
| G12V mutant pegRNA #3   | AAACTTGTGGTAGTTGGAGC       | TGG | GCCAAcAGCTCCAAC TACCACAA         | 13              | 10              |
| G12V mutant pegRNA #4   | AAACTTGTGGTAGTTGGAGC       | TGG | ACGCCAAcAGCTCCAAC TACC           | 9               | 12              |
| G12V mutant pegRNA #5   | AAACTTGTGGTAGTTGGAGC       | TGG | ACGCCAAcAGCTCCAAC TACCAC         | 11              | 12              |
| G12V mutant pegRNA #6   | AAACTTGTGGTAGTTGGAGC       | TGG | ACGCCAAcAGCTCCAAC TACCACAA       | 13              | 12              |
| G12V mutant pegRNA #7   | AAACTTGTGGTAGTTGGAGC       | TGG | GCCTACGCCAAcAGCTCCAAC TACC       | 9               | 16              |
| G12V mutant pegRNA #8   | AAACTTGTGGTAGTTGGAGC       | TGG | GCCTACGCCAAcAGCTCCAAC TACCAC     | 11              | 16              |
| G12V mutant pegRNA #9   | AAACTTGTGGTAGTTGGAGC       | TGG | GCCTACGCCAAcAGCTCCAAC TACCACAA   | 13              | 16              |
| G13C mutant pegRNA #1   | CTTGTGGTAGTTGGAGCTGG       | TGG | TGCCTACGCaACCAGCTCCAAC           | 8               | 14              |
| G13C mutant pegRNA #2   | CTTGTGGTAGTTGGAGCTGG       | TGG | TGCCTACGCaACCAGCTCCAAC TAC       | 11              | 14              |
| G13C mutant pegRNA #3   | CTTGTGGTAGTTGGAGCTGG       | TGG | TGCCTACGCaACCAGCTCCAAC TACCA     | 13              | 14              |
| G13D mutant pegRNA #1   | CTTGTGGTAGTTGGAGCTGG       | TGG | TGCCTACGtCACCAGCTCCAAC           | 8               | 14              |
| G13D mutant pegRNA #2   | CTTGTGGTAGTTGGAGCTGG       | TGG | TGCCTACGtCACCAGCTCCAAC TAC       | 11              | 14              |
| G13D mutant pegRNA #3   | CTTGTGGTAGTTGGAGCTGG       | TGG | TGCCTACGtCACCAGCTCCAAC TACCA     | 13              | 14              |
| Universal pegRNA #1-1   | TATAAACTTGTGGTAGTTGG       | AG  | AccAGCTCCAAC TACCACA             | 9               | 10              |
| Universal pegRNA #1-2   | TATAAACTTGTGGTAGTTGG       | AG  | AccAGCTCCAAC TACCACAAG           | 11              | 10              |
| Universal pegRNA #1-3   | TATAAACTTGTGGTAGTTGG       | AG  | AccAGCTCCAAC TACCACAAGTT         | 13              | 10              |
| Universal pegRNA #1-4   | TATAAACTTGTGGTAGTTGG       | AG  | GccAccAGCTCCAAC TACCACA          | 9               | 13              |
| Universal pegRNA #1-5   | TATAAACTTGTGGTAGTTGG       | AG  | GccAccAGCTCCAAC TACCACAAG        | 11              | 13              |
| Universal pegRNA #1-6   | TATAAACTTGTGGTAGTTGG       | AG  | GccAccAGCTCCAAC TACCACAAGTT      | 13              | 13              |
| Universal pegRNA #1-7   | TATAAACTTGTGGTAGTTGG       | AG  | TACGccAccAGCTCCAAC TACCACA       | 9               | 16              |
| Universal pegRNA #1-8   | TATAAACTTGTGGTAGTTGG       | AG  | TACGccAccAGCTCCAAC TACCACAAG     | 11              | 16              |
| Universal pegRNA #1-9   | TATAAACTTGTGGTAGTTGG       | AG  | TACGccAccAGCTCCAAC TACCACAAGTT   | 13              | 16              |
| Universal pegRNA #2-1   | CGTCAAGGCACTCTTGCCCTA      | CG  | ggTggCGTAGGCAAGAGTG              | 9               | 10              |
| Universal pegRNA #2-2   | CGTCAAGGCACTCTTGCCCTA      | CG  | ggTggCGTAGGCAAGAGTGCC            | 11              | 10              |
| Universal pegRNA #2-3   | CGTCAAGGCACTCTTGCCCTA      | CG  | ggTggCGTAGGCAAGAGTGCCCT          | 13              | 10              |
| Universal pegRNA #2-4   | CGTCAAGGCACTCTTGCCCTA      | CG  | GCTggTggCGTAGGCAAGAGTG           | 9               | 13              |
| Universal pegRNA #2-5   | CGTCAAGGCACTCTTGCCCTA      | CG  | GCTggTggCGTAGGCAAGAGTGCC         | 11              | 13              |
| Universal pegRNA #2-6   | CGTCAAGGCACTCTTGCCCTA      | CG  | GCTggTggCGTAGGCAAGAGTGCCCT       | 13              | 13              |
| Universal pegRNA #2-7   | CGTCAAGGCACTCTTGCCCTA      | CG  | GGAGCTggTggCGTAGGCAAGAGTG        | 9               | 16              |
| Universal pegRNA #2-8   | CGTCAAGGCACTCTTGCCCTA      | CG  | GGAGCTggTggCGTAGGCAAGAGTGCC      | 11              | 16              |
| Universal pegRNA #2-9   | CGTCAAGGCACTCTTGCCCTA      | CG  | GGAGCTggTggCGTAGGCAAGAGTGCCCT    | 13              | 16              |
| PE3b Correction gRNA #1 | GCACCTTTGCCTACGCCACC       | AG  | N/A                              | N/A             | N/A             |
| PE3b Correction gRNA #2 | GTGGTAGTTGGAGCTGGTGG       | CG  | N/A                              | N/A             | N/A             |
| pegRNA-silent mutation  | CGTCAAGGCACTCTTGCCCTA      | CG  | GGAGCaggTggCGTAGGCAAGAGTGCCCT    | 13              | 16              |

  

| epegRNA name           | Spacer sequence (5' to 3') | PAM | 3' extension sequence (5' to 3') | PBS length (nt) | RTT length (nt) | Linker   |
|------------------------|----------------------------|-----|----------------------------------|-----------------|-----------------|----------|
| TevopreQ1 epegRNA #2-9 | CGTCAAGGCACTCTTGCCCTA      | CG  | GGAGCTggTggCGTAGGCAAGAGTGCCCT    | 13              | 16              | CTTAAGTA |
| Tmpknot epegRNA #2-9   | CGTCAAGGCACTCTTGCCCTA      | CG  | GGAGCTggTggCGTAGGCAAGAGTGCCCT    | 13              | 16              | TAATTATA |

**Supplementary Table 6.** Primer sequences used in this study.

| Target sites                                                           | Primer name | Forward primers                                      | Reverse primers                                          |
|------------------------------------------------------------------------|-------------|------------------------------------------------------|----------------------------------------------------------|
| Endogenous <i>KRAS</i>                                                 | 1st         | CTTAAGCGTCGATGGAGGAG                                 | CCCTGACATACTCCAAGGA                                      |
|                                                                        | 2nd         | ACACTCTTCCCTACACGACGCTCTCCGATCTAGGCCTGCTGAAAATGACTG  | GTGACTGGAGTTCAGACGTGTGCTCTCCGATCTTCATGAAAATGGTCAGAGAAACC |
| Lenti_ <i>KRAS</i> sequence<br>(HEK293T/17- <i>KRAS</i> library cells) | 1st         | GTGTACGGTGGGAGGCCTAT                                 | GTCCGCTGCGAGGGTACTA                                      |
|                                                                        | 2nd         | ACACTCTTCCCTACACGACGCTCTCCGATCTGCTCGTTTAGTGAACCGTCAG | GTGACTGGAGTTCAGACGTGTGCTCTCCGATCTACGTGAAGAATGTGCGAGA     |
| Universal pegRNA #2 OT1                                                | 2nd         | ACACTCTTCCCTACACGACGCTCTCCGATCTTGCCAGTAGTCCCAGCTA    | GTGACTGGAGTTCAGACGTGTGCTCTCCGATCTTACAAAAGAACCATGGAAGG    |
| Universal pegRNA #2 OT2                                                | 2nd         | ACACTCTTCCCTACACGACGCTCTCCGATCTTGGATTTGGACTTGCATGA   | GTGACTGGAGTTCAGACGTGTGCTCTCCGATCTGTCCCCAAAGCCTTAATC      |
| Universal pegRNA #2 OT3                                                | 2nd         | ACACTCTTCCCTACACGACGCTCTCCGATCTTGAGAAATGCATCGGCACAC  | GTGACTGGAGTTCAGACGTGTGCTCTCCGATCTTTCAGCGCTTTCAGTGTCA     |
| Universal pegRNA #2 OT4                                                | 2nd         | ACACTCTTCCCTACACGACGCTCTCCGATCTTACACCCCTCAAATTGGCA   | GTGACTGGAGTTCAGACGTGTGCTCTCCGATCTTGCCTGCTGATGGACATTA     |
| Universal pegRNA #2 OT5                                                | 2nd         | ACACTCTTCCCTACACGACGCTCTCCGATCTGCAGATACCCAGGAGAGCTT  | GTGACTGGAGTTCAGACGTGTGCTCTCCGATCTAGGATCCCTTGAGCGCTG      |
