# Supplementary material for: CRISPR prime editing for unconstrained correction of oncogenic KRAS variants
Source: PubMed Central journal article supplement (PMC10313713; doi:10.1038/s42003-023-05052-1), 2023-06-30
Supplement: 42003_2023_5052_MOESM3_ESM.pdf [file 42003_2023_5052_MOESM3_ESM.pdf]

## Description of Additional Supplementary Files

**File name:** Supplementary Data 1

**Description:** Source data for the plots and graphs in the figures.
